# Supplementary material for: Modeling and inferences for bivariate signed integer-valued autoregressive models
Source: Springer Nature journal article supplement (doi:10.1007/s42952-024-00300-4), 2024-12-27
Supplement: 42952_2024_300_MOESM1_ESM.pdf [file 42952_2024_300_MOESM1_ESM.pdf]

**Supplementary material for “Modeling and Inferences for Bivariate Signed Integer-valued Autoregressive Models” by Sangyeol Lee and Minyoung Jo**

Table 1: Sample mean, variance, and MSE of estimators for the BSINAR(1) model when  $(\mu_{11}, \mu_{12}, \mu_{21}, \mu_{22}, \psi_{11}, \psi_{12}, \psi_{21}, \psi_{22}) = (0.5, 0.2, 0.2, 0.4, 2, 3, 3, 2)$ ,  $\phi = 0$ , and no outliers exist.

| $\gamma$ | statistics             | estimators         |                    |                    |                    |                     |                     |                     |                     | $\text{tr}(As.\hat{var})$ |
|----------|------------------------|--------------------|--------------------|--------------------|--------------------|---------------------|---------------------|---------------------|---------------------|---------------------------|
|          |                        | $\hat{\mu}_{11,n}$ | $\hat{\mu}_{12,n}$ | $\hat{\mu}_{21,n}$ | $\hat{\mu}_{22,n}$ | $\hat{\psi}_{11,n}$ | $\hat{\psi}_{12,n}$ | $\hat{\psi}_{21,n}$ | $\hat{\psi}_{22,n}$ |                           |
| 0(QMLE)  | mean                   | 0.482              | 0.202              | 0.195              | 0.393              | 1.995               | 2.993               | 2.974               | 2.023               | <b>1.815</b>              |
|          | variance $\times 10^3$ | 4.601              | 5.022              | 2.729              | 4.819              | 45.121              | 49.988              | 37.961              | 53.488              |                           |
|          | MSE $\times 10^2$      | <b>0.433</b>       | <b>0.377</b>       | <b>0.272</b>       | <b>0.457</b>       | <b>4.469</b>        | <b>4.952</b>        | <b>3.824</b>        | <b>4.867</b>        |                           |
| 0.1      | mean                   | 0.509              | 0.205              | 0.208              | 0.404              | 2.018               | 3.063               | 3.041               | 2.018               | 2.722                     |
|          | variance $\times 10^3$ | 4.490              | 3.783              | 3.696              | 5.241              | 45.291              | 54.548              | 47.308              | 48.820              |                           |
|          | MSE $\times 10^2$      | 0.453              | 0.410              | 0.373              | 0.481              | 4.517               | 5.809               | 4.852               | 4.952               |                           |
| 0.2      | mean                   | 0.507              | 0.205              | 0.207              | 0.403              | 2.013               | 3.062               | 3.036               | 2.018               | 2.908                     |
|          | variance $\times 10^3$ | 4.515              | 4.116              | 3.794              | 5.504              | 47.420              | 59.338              | 48.589              | 49.694              |                           |
|          | MSE $\times 10^2$      | 0.453              | 0.430              | 0.380              | 0.520              | 4.712               | 6.263               | 4.944               | 5.349               |                           |
| 0.3      | mean                   | 0.499              | 0.205              | 0.201              | 0.409              | 1.983               | 3.058               | 3.042               | 2.012               | 5.177                     |
|          | variance $\times 10^3$ | 4.378              | 4.315              | 4.037              | 4.525              | 53.299              | 66.968              | 49.912              | 53.976              |                           |
|          | MSE $\times 10^2$      | 0.487              | 0.466              | 0.399              | 0.535              | 5.302               | 6.970               | 5.118               | 5.358               |                           |
| 0.5      | mean                   | 0.506              | 0.203              | 0.204              | 0.401              | 2.002               | 3.054               | 3.022               | 2.019               | 6.832                     |
|          | variance $\times 10^3$ | 5.150              | 4.704              | 4.251              | 5.410              | 53.870              | 61.422              | 52.455              | 54.730              |                           |
|          | MSE $\times 10^2$      | 0.514              | 0.497              | 0.422              | 0.546              | 5.333               | 6.381               | 5.242               | 5.457               |                           |
| 1        | mean                   | 0.505              | 0.199              | 0.199              | 0.399              | 1.991               | 3.042               | 3.006               | 2.023               | 12.127                    |
|          | variance $\times 10^3$ | 6.476              | 5.580              | 5.231              | 6.133              | 70.057              | 72.963              | 59.274              | 66.575              |                           |
|          | MSE $\times 10^2$      | 0.644              | 0.552              | 0.517              | 0.607              | 6.943               | 7.404               | 5.872               | 6.647               |                           |

Table 2: Sample mean, variance, and MSE of estimators for the BSINAR(1) model when  $(\mu_{11}, \mu_{12}, \mu_{21}, \mu_{22}, \psi_{11}, \psi_{12}, \psi_{21}, \psi_{22}) = (0.5, 0.2, 0.2, 0.4, 2, 3, 3, 2)$ ,  $\phi = 0.5$ , and no outliers exist.

| $\gamma$ | statistics             | estimators         |                    |                    |                    |                     |                     |                     |                     | $\text{tr}(As.\hat{var})$ |
|----------|------------------------|--------------------|--------------------|--------------------|--------------------|---------------------|---------------------|---------------------|---------------------|---------------------------|
|          |                        | $\hat{\mu}_{11,n}$ | $\hat{\mu}_{12,n}$ | $\hat{\mu}_{21,n}$ | $\hat{\mu}_{22,n}$ | $\hat{\psi}_{11,n}$ | $\hat{\psi}_{12,n}$ | $\hat{\psi}_{21,n}$ | $\hat{\psi}_{22,n}$ |                           |
| 0(QMLE)  | mean                   | 0.490              | 0.191              | 0.197              | 0.400              | 2.011               | 2.953               | 2.957               | 2.030               | <b>2.121</b>              |
|          | variance $\times 10^3$ | 2.804              | 3.238              | 2.148              | 3.350              | 47.453              | 51.233              | 46.419              | 50.038              |                           |
|          | MSE $\times 10^2$      | <b>0.286</b>       | <b>0.327</b>       | <b>0.213</b>       | <b>0.331</b>       | <b>4.712</b>        | <b>4.344</b>        | <b>4.705</b>        | <b>5.049</b>        |                           |
| 0.1      | mean                   | 0.532              | 0.206              | 0.205              | 0.416              | 2.081               | 3.037               | 3.037               | 2.090               | 3.663                     |
|          | variance $\times 10^3$ | 3.142              | 3.363              | 2.371              | 3.891              | 48.259              | 49.003              | 53.801              | 49.169              |                           |
|          | MSE $\times 10^2$      | 0.418              | 0.336              | 0.237              | 0.412              | 5.444               | 4.564               | 4.776               | 5.073               |                           |
| 0.2      | mean                   | 0.533              | 0.205              | 0.205              | 0.415              | 2.083               | 3.034               | 3.030               | 2.096               | 3.765                     |
|          | variance $\times 10^3$ | 3.518              | 3.881              | 2.592              | 4.097              | 48.959              | 48.780              | 51.279              | 49.574              |                           |
|          | MSE $\times 10^2$      | 0.438              | 0.387              | 0.259              | 0.429              | 5.546               | 4.904               | 5.058               | 5.682               |                           |
| 0.3      | mean                   | 0.525              | 0.210              | 0.215              | 0.410              | 2.077               | 3.039               | 3.038               | 2.060               | 4.515                     |
|          | variance $\times 10^3$ | 3.770              | 3.887              | 3.550              | 4.006              | 40.562              | 47.977              | 46.032              | 47.519              |                           |
|          | MSE $\times 10^2$      | 0.460              | 0.395              | 0.375              | 0.406              | 4.619               | 4.950               | 5.170               | 5.845               |                           |
| 0.5      | mean                   | 0.532              | 0.205              | 0.203              | 0.412              | 2.077               | 3.007               | 3.013               | 2.097               | 6.811                     |
|          | variance $\times 10^3$ | 4.434              | 5.073              | 3.627              | 5.064              | 53.930              | 43.820              | 50.915              | 49.634              |                           |
|          | MSE $\times 10^2$      | 0.547              | 0.505              | 0.360              | 0.517              | 5.943               | 4.994               | 5.445               | 5.863               |                           |
| 1        | mean                   | 0.531              | 0.200              | 0.197              | 0.410              | 2.061               | 2.978               | 2.993               | 2.092               | 10.019                    |
|          | variance $\times 10^3$ | 5.719              | 6.502              | 4.793              | 5.813              | 65.399              | 45.640              | 54.952              | 56.436              |                           |
|          | MSE $\times 10^2$      | 0.664              | 0.643              | 0.474              | 0.585              | 6.854               | 5.286               | 5.466               | 6.446               |                           |

Table 3: Sample mean, variance, and MSE of estimators for the BSINAR(1) model when  $(\mu_{11}, \mu_{12}, \mu_{21}, \mu_{22}, \psi_{11}, \psi_{12}, \psi_{21}, \psi_{22}) = (0.5, 0.2, 0.3, 0.5, 3, 3, 2, 2)$ ,  $\phi = 0$ , and no outliers exist.

| $\gamma$ | statistics             | estimators         |                    |                    |                    |                     |                     |                     |                     | $\text{tr}(A\hat{s}.var)$ |
|----------|------------------------|--------------------|--------------------|--------------------|--------------------|---------------------|---------------------|---------------------|---------------------|---------------------------|
|          |                        | $\hat{\mu}_{11,n}$ | $\hat{\mu}_{12,n}$ | $\hat{\mu}_{21,n}$ | $\hat{\mu}_{22,n}$ | $\hat{\psi}_{11,n}$ | $\hat{\psi}_{12,n}$ | $\hat{\psi}_{21,n}$ | $\hat{\psi}_{22,n}$ |                           |
| 0(QMLE)  | mean                   | 0.479              | 0.187              | 0.288              | 0.481              | 3.000               | 2.971               | 2.002               | 1.972               | <b>1.985</b>              |
|          | variance $\times 10^3$ | 2.762              | 3.849              | 2.818              | 2.430              | 61.601              | 59.856              | 42.816              | 40.158              |                           |
|          | MSE $\times 10^2$      | <b>0.315</b>       | <b>0.396</b>       | <b>0.292</b>       | <b>0.273</b>       | <b>6.098</b>        | <b>6.011</b>        | <b>4.239</b>        | <b>4.051</b>        |                           |
| 0.1      | mean                   | 0.524              | 0.216              | 0.295              | 0.506              | 3.067               | 3.046               | 2.015               | 2.046               | 2.347                     |
|          | variance $\times 10^3$ | 4.491              | 4.818              | 2.254              | 4.033              | 70.016              | 48.620              | 39.329              | 51.071              |                           |
|          | MSE $\times 10^2$      | 0.428              | 0.505              | 0.225              | 0.373              | 5.234               | 5.027               | 3.918               | 5.043               |                           |
| 0.2      | mean                   | 0.510              | 0.212              | 0.318              | 0.495              | 3.016               | 3.046               | 2.034               | 1.999               | 2.822                     |
|          | variance $\times 10^3$ | 4.220              | 6.695              | 2.874              | 4.076              | 52.607              | 73.292              | 58.886              | 50.944              |                           |
|          | MSE $\times 10^2$      | 0.502              | 0.634              | 0.314              | 0.404              | 5.265               | 5.501               | 4.909               | 5.273               |                           |
| 0.3      | mean                   | 0.512              | 0.223              | 0.301              | 0.506              | 3.044               | 3.028               | 2.035               | 2.002               | 3.909                     |
|          | variance $\times 10^3$ | 5.140              | 6.509              | 3.374              | 4.421              | 51.192              | 54.754              | 48.318              | 58.373              |                           |
|          | MSE $\times 10^2$      | 0.524              | 0.679              | 0.316              | 0.405              | 6.086               | 6.005               | 5.948               | 5.305               |                           |
| 0.5      | mean                   | 0.514              | 0.206              | 0.311              | 0.486              | 3.032               | 3.048               | 1.967               | 1.983               | 7.217                     |
|          | variance $\times 10^3$ | 5.491              | 6.366              | 3.068              | 3.602              | 73.180              | 58.323              | 70.384              | 62.879              |                           |
|          | MSE $\times 10^2$      | 0.562              | 0.701              | 0.334              | 0.442              | 7.348               | 6.081               | 6.946               | 5.779               |                           |
| 1        | mean                   | 0.519              | 0.202              | 0.295              | 0.502              | 3.001               | 2.982               | 2.010               | 2.010               | 13.518                    |
|          | variance $\times 10^3$ | 6.989              | 8.708              | 3.540              | 4.629              | 61.477              | 61.100              | 70.065              | 53.480              |                           |
|          | MSE $\times 10^2$      | 0.731              | 0.862              | 0.352              | 0.458              | 7.381               | 7.472               | 7.073               | 6.252               |                           |

Table 4: Sample mean, variance, and MSE of estimators for the BSINAR(1) model when  $(\mu_{11}, \mu_{12}, \mu_{21}, \mu_{22}, \psi_{11}, \psi_{12}, \psi_{21}, \psi_{22}) = (0.5, 0.2, 0.3, 0.5, 3, 3, 2, 2)$ ,  $\phi = 0.5$ , and no outliers exist.

| $\gamma$ | statistics             | estimators         |                    |                    |                    |                     |                     |                     |                     | $\text{tr}(As.\hat{var})$ |
|----------|------------------------|--------------------|--------------------|--------------------|--------------------|---------------------|---------------------|---------------------|---------------------|---------------------------|
|          |                        | $\hat{\mu}_{11,n}$ | $\hat{\mu}_{12,n}$ | $\hat{\mu}_{21,n}$ | $\hat{\mu}_{22,n}$ | $\hat{\psi}_{11,n}$ | $\hat{\psi}_{12,n}$ | $\hat{\psi}_{21,n}$ | $\hat{\psi}_{22,n}$ |                           |
| 0(QMLE)  | mean                   | 0.477              | 0.194              | 0.290              | 0.479              | 2.950               | 2.935               | 2.060               | 2.006               | <b>3.014</b>              |
|          | variance $\times 10^3$ | 2.539              | 3.454              | 2.044              | 2.758              | 43.301              | 51.233              | 41.637              | 52.868              |                           |
|          | MSE $\times 10^2$      | <b>0.301</b>       | <b>0.345</b>       | <b>0.211</b>       | <b>0.316</b>       | <b>4.535</b>        | <b>5.483</b>        | <b>4.489</b>        | <b>5.238</b>        |                           |
| 0.1      | mean                   | 0.530              | 0.217              | 0.313              | 0.508              | 3.064               | 3.025               | 2.106               | 2.105               | 3.812                     |
|          | variance $\times 10^3$ | 2.935              | 3.889              | 2.898              | 4.135              | 44.753              | 62.499              | 46.443              | 49.833              |                           |
|          | MSE $\times 10^2$      | 0.374              | 0.416              | 0.304              | 0.417              | 4.849               | 5.105               | 4.152               | 4.184               |                           |
| 0.2      | mean                   | 0.524              | 0.212              | 0.319              | 0.503              | 3.030               | 3.054               | 2.102               | 2.088               | 4.025                     |
|          | variance $\times 10^3$ | 3.156              | 5.477              | 2.811              | 4.665              | 50.410              | 60.975              | 41.998              | 46.603              |                           |
|          | MSE $\times 10^2$      | 0.384              | 0.491              | 0.312              | 0.440              | 5.065               | 5.962               | 4.301               | 4.388               |                           |
| 0.3      | mean                   | 0.527              | 0.215              | 0.304              | 0.509              | 3.028               | 3.046               | 2.112               | 2.096               | 5.341                     |
|          | variance $\times 10^3$ | 4.576              | 5.431              | 3.136              | 4.365              | 50.365              | 70.849              | 55.542              | 67.989              |                           |
|          | MSE $\times 10^2$      | 0.495              | 0.558              | 0.316              | 0.463              | 5.081               | 6.254               | 5.213               | 5.388               |                           |
| 0.5      | mean                   | 0.531              | 0.209              | 0.324              | 0.490              | 3.029               | 3.019               | 2.069               | 2.055               | 9.091                     |
|          | variance $\times 10^3$ | 4.013              | 5.786              | 3.657              | 7.689              | 64.989              | 51.172              | 37.081              | 39.167              |                           |
|          | MSE $\times 10^2$      | 0.530              | 0.561              | 0.389              | 0.494              | 5.905               | 6.334               | 5.721               | 6.036               |                           |
| 1        | mean                   | 0.526              | 0.216              | 0.312              | 0.508              | 2.940               | 2.935               | 2.081               | 2.080               | 16.218                    |
|          | variance $\times 10^3$ | 4.821              | 4.689              | 3.767              | 4.921              | 56.011              | 56.011              | 36.808              | 37.781              |                           |
|          | MSE $\times 10^2$      | 0.546              | 0.582              | 0.420              | 0.769              | 6.518               | 7.230               | 6.767               | 7.655               |                           |

Table 5: Sample mean, variance, and MSE of estimators for the BSINAR(1) model when  $(\mu_{11}, \mu_{12}, \mu_{21}, \mu_{22}, \psi_{11}, \psi_{12}, \psi_{21}, \psi_{22}) = (0.5, 0.2, 0.2, 0.4, 2, 3, 3, 2)$ ,  $\phi = 0$ , and outliers exist.

| $\gamma$ | statistics             | estimators         |                    |                    |                    |                     |                     |                     |                     | $\text{tr}(As.\hat{var})$ |
|----------|------------------------|--------------------|--------------------|--------------------|--------------------|---------------------|---------------------|---------------------|---------------------|---------------------------|
|          |                        | $\hat{\mu}_{11,n}$ | $\hat{\mu}_{12,n}$ | $\hat{\mu}_{21,n}$ | $\hat{\mu}_{22,n}$ | $\hat{\psi}_{11,n}$ | $\hat{\psi}_{12,n}$ | $\hat{\psi}_{21,n}$ | $\hat{\psi}_{22,n}$ |                           |
| 0(QMLE)  | mean                   | 0.359              | 0.135              | 0.146              | 0.292              | 2.648               | 3.550               | 3.509               | 2.594               | 3.822                     |
|          | variance $\times 10^3$ | 4.960              | 4.304              | 3.833              | 5.165              | 102.817             | 94.428              | 97.152              | 106.611             |                           |
|          | MSE $\times 10^2$      | 2.463              | 0.841              | 0.666              | 1.665              | 52.297              | 39.693              | 35.587              | 45.890              |                           |
| 0.1      | mean                   | 0.397              | 0.121              | 0.150              | 0.354              | 2.662               | 3.991               | 3.865               | 2.693               | 3.804                     |
|          | variance $\times 10^3$ | 5.415              | 5.478              | 4.681              | 7.580              | 103.331             | 129.009             | 123.604             | 131.032             |                           |
|          | MSE $\times 10^2$      | 1.582              | 1.170              | 0.711              | 0.956              | 54.107              | 111.021             | 87.120              | 61.111              |                           |
| 0.2      | mean                   | 0.417              | 0.154              | 0.151              | 0.318              | 2.242               | 3.319               | 3.233               | 2.250               | <b>2.912</b>              |
|          | variance $\times 10^3$ | 6.030              | 3.679              | 4.031              | 6.836              | 59.711              | 59.869              | 70.969              | 60.685              |                           |
|          | MSE $\times 10^2$      | 1.270              | <b>0.570</b>       | <b>0.633</b>       | 1.337              | <b>11.783</b>       | <b>16.135</b>       | <b>12.483</b>       | <b>12.271</b>       |                           |
| 0.3      | mean                   | 0.430              | 0.131              | 0.153              | 0.374              | 2.399               | 3.772               | 3.668               | 2.436               | 4.531                     |
|          | variance $\times 10^3$ | 4.126              | 4.739              | 4.830              | 6.376              | 99.685              | 114.971             | 113.431             | 103.967             |                           |
|          | MSE $\times 10^2$      | 0.896              | 0.936              | 0.690              | 0.697              | 25.860              | 71.007              | 55.978              | 29.369              |                           |
| 0.5      | mean                   | 0.451              | 0.145              | 0.162              | 0.399              | 2.297               | 3.631               | 3.555               | 2.325               | 6.169                     |
|          | variance $\times 10^3$ | 4.151              | 5.527              | 5.577              | 6.359              | 97.248              | 100.633             | 116.944             | 103.023             |                           |
|          | MSE $\times 10^2$      | 0.642              | 0.848              | 0.693              | <b>0.629</b>       | 18.456              | 49.865              | 42.440              | 20.788              |                           |
| 1        | mean                   | 0.489              | 0.174              | 0.178              | 0.483              | 2.173               | 3.451               | 3.389               | 2.195               | 12.217                    |
|          | variance $\times 10^3$ | 4.436              | 8.071              | 7.469              | 8.146              | 90.461              | 94.461              | 106.081             | 133.363             |                           |
|          | MSE $\times 10^2$      | <b>0.451</b>       | 0.864              | 0.786              | 0.954              | 11.987              | 29.714              | 25.675              | 17.023              |                           |

Table 6: Sample mean, variance, and MSE of estimators for the BSINAR(1) model when  $(\mu_{11}, \mu_{12}, \mu_{21}, \mu_{22}, \psi_{11}, \psi_{12}, \psi_{21}, \psi_{22}) = (0.5, 0.2, 0.2, 0.4, 2, 3, 3, 2)$ ,  $\phi = 0.5$ , and outliers exist.

| $\gamma$ | statistics             | estimators         |                    |                    |                    |                     |                     |                     |                     | $\text{tr}(As.\hat{var})$ |
|----------|------------------------|--------------------|--------------------|--------------------|--------------------|---------------------|---------------------|---------------------|---------------------|---------------------------|
|          |                        | $\hat{\mu}_{11,n}$ | $\hat{\mu}_{12,n}$ | $\hat{\mu}_{21,n}$ | $\hat{\mu}_{22,n}$ | $\hat{\psi}_{11,n}$ | $\hat{\psi}_{12,n}$ | $\hat{\psi}_{21,n}$ | $\hat{\psi}_{22,n}$ |                           |
| 0(QMLE)  | mean                   | 0.400              | 0.137              | 0.153              | 0.314              | 2.540               | 3.409               | 3.377               | 2.549               | 3.715                     |
|          | variance $\times 10^3$ | 4.201              | 3.371              | 3.128              | 3.470              | 117.109             | 97.991              | 93.450              | 120.109             |                           |
|          | MSE $\times 10^2$      | 1.404              | 0.721              | 0.529              | 1.071              | 40.806              | 26.490              | 23.478              | 42.113              |                           |
| 0.1      | mean                   | 0.458              | 0.164              | 0.175              | 0.349              | 2.488               | 3.388               | 3.308               | 2.377               | 3.231                     |
|          | variance $\times 10^3$ | 4.871              | 4.112              | 3.121              | 5.308              | 97.680              | 64.430              | 57.436              | 70.245              |                           |
|          | MSE $\times 10^2$      | 0.681              | 0.631              | 0.522              | 0.853              | 33.513              | 21.448              | 15.372              | 21.196              |                           |
| 0.2      | mean                   | 0.464              | 0.163              | 0.173              | 0.365              | 2.296               | 3.276               | 3.268               | 2.309               | 4.211                     |
|          | variance $\times 10^3$ | 3.908              | 3.381              | 4.216              | 6.084              | 76.706              | 72.749              | 82.480              | 76.106              |                           |
|          | MSE $\times 10^2$      | 0.655              | 0.531              | 0.489              | 0.826              | 16.784              | 14.828              | 15.190              | 17.115              |                           |
| 0.3      | mean                   | 0.467              | 0.172              | 0.169              | 0.353              | 2.302               | 3.229               | 3.169               | 2.220               | 6.214                     |
|          | variance $\times 10^3$ | 5.402              | 4.120              | 3.385              | 6.185              | 77.053              | 51.493              | 48.617              | 64.319              |                           |
|          | MSE $\times 10^2$      | 0.637              | 0.498              | 0.444              | 0.814              | 16.414              | 10.384              | 7.691               | 11.243              |                           |
| 0.5      | mean                   | 0.478              | 0.185              | 0.172              | 0.363              | 2.234               | 3.157               | 3.104               | 2.171               | 5.112                     |
|          | variance $\times 10^3$ | 5.947              | 4.812              | 3.719              | 6.870              | 69.946              | 50.782              | 46.480              | 65.158              |                           |
|          | MSE $\times 10^2$      | 0.633              | 0.482              | 0.429              | 0.779              | 12.401              | 7.514               | 5.686               | 9.381               |                           |
| 1        | mean                   | 0.490              | 0.200              | 0.177              | 0.380              | 2.178               | 3.096               | 3.052               | 2.130               | <b>2.036</b>              |
|          | variance $\times 10^3$ | 6.786              | 6.373              | 4.851              | 8.219              | 65.034              | 47.870              | 53.786              | 74.489              |                           |
|          | MSE $\times 10^2$      | <b>0.514</b>       | <b>0.471</b>       | <b>0.369</b>       | <b>0.722</b>       | <b>9.629</b>        | <b>5.670</b>        | <b>5.600</b>        | <b>9.070</b>        |                           |

Table 7: Sample mean, variance, and MSE of estimators for the BSINAR(1) model when  $(\mu_{11}, \mu_{12}, \mu_{21}, \mu_{22}, \psi_{11}, \psi_{12}, \psi_{21}, \psi_{22}) = (0.5, 0.2, 0.3, 0.5, 3, 3, 2, 2)$ ,  $\phi = 0$ , and outliers exist.

| $\gamma$ | statistics             | estimators         |                    |                    |                    |                     |                     |                     |                     | $\text{tr}(As.\hat{var})$ |
|----------|------------------------|--------------------|--------------------|--------------------|--------------------|---------------------|---------------------|---------------------|---------------------|---------------------------|
|          |                        | $\hat{\mu}_{11,n}$ | $\hat{\mu}_{12,n}$ | $\hat{\mu}_{21,n}$ | $\hat{\mu}_{22,n}$ | $\hat{\psi}_{11,n}$ | $\hat{\psi}_{12,n}$ | $\hat{\psi}_{21,n}$ | $\hat{\psi}_{22,n}$ |                           |
| 0(QMLE)  | mean                   | 0.392              | 0.121              | 0.238              | 0.301              | 3.479               | 3.501               | 2.791               | 2.751               | 5.119                     |
|          | variance $\times 10^3$ | 4.571              | 4.122              | 5.233              | 10.545             | 82.681              | 73.353              | 118.079             | 117.270             |                           |
|          | MSE $\times 10^2$      | 1.600              | 1.020              | 0.901              | 4.983              | 31.216              | 32.394              | 74.336              | 68.075              |                           |
| 0.1      | mean                   | 0.456              | 0.155              | 0.264              | 0.367              | 3.381               | 3.419               | 2.499               | 2.490               | 3.217                     |
|          | variance $\times 10^3$ | 4.091              | 4.509              | 3.988              | 7.787              | 70.391              | 97.860              | 89.105              | 69.540              |                           |
|          | MSE $\times 10^2$      | 0.595              | <b>0.642</b>       | 0.519              | 2.519              | 21.449              | 27.247              | 33.748              | 30.951              |                           |
| 0.2      | mean                   | 0.474              | 0.151              | 0.278              | 0.403              | 3.288               | 3.278               | 2.267               | 2.282               | 4.858                     |
|          | variance $\times 10^3$ | 7.167              | 6.298              | 3.262              | 6.562              | 94.224              | 80.802              | 47.435              | 96.949              |                           |
|          | MSE $\times 10^2$      | 0.774              | 0.857              | <b>0.370</b>       | 1.583              | 17.664              | 15.770              | 11.859              | 17.574              |                           |
| 0.3      | mean                   | 0.464              | 0.177              | 0.269              | 0.421              | 3.205               | 3.178               | 2.263               | 2.224               | 7.215                     |
|          | variance $\times 10^3$ | 4.527              | 6.014              | 3.683              | 8.524              | 73.561              | 68.152              | 76.867              | 72.781              |                           |
|          | MSE $\times 10^2$      | <b>0.572</b>       | 0.645              | 0.459              | 1.464              | 11.525              | 9.916               | 14.535              | 12.241              |                           |
| 0.5      | mean                   | 0.465              | 0.198              | 0.275              | 0.445              | 3.156               | 3.158               | 2.186               | 2.189               | 6.823                     |
|          | variance $\times 10^3$ | 5.368              | 8.288              | 4.949              | 9.236              | 71.952              | 69.489              | 103.485             | 62.488              |                           |
|          | MSE $\times 10^2$      | 0.649              | 0.820              | 0.547              | 1.212              | <b>9.560</b>        | 9.379               | 13.842              | 9.794               |                           |
| 1        | mean                   | 0.502              | 0.202              | 0.292              | 0.503              | 3.154               | 3.117               | 2.082               | 2.107               | <b>2.989</b>              |
|          | variance $\times 10^3$ | 6.639              | 9.257              | 4.407              | 5.915              | 75.865              | 80.658              | 68.810              | 75.534              |                           |
|          | MSE $\times 10^2$      | 0.657              | 0.917              | 0.441              | <b>0.586</b>       | 9.911               | <b>9.375</b>        | <b>7.485</b>        | <b>8.628</b>        |                           |

Table 8: Sample mean, variance, and MSE of estimators for the BSINAR(1) model when  $(\mu_{11}, \mu_{12}, \mu_{21}, \mu_{22}, \psi_{11}, \psi_{12}, \psi_{21}, \psi_{22}) = (0.5, 0.2, 0.3, 0.5, 3, 3, 2, 2)$ ,  $\phi = 0.5$ , and outliers exist.

| $\gamma$ | statistics             | estimators         |                    |                    |                    |                     |                     |                     |                     | $\text{tr}(As.\hat{var})$ |
|----------|------------------------|--------------------|--------------------|--------------------|--------------------|---------------------|---------------------|---------------------|---------------------|---------------------------|
|          |                        | $\hat{\mu}_{11,n}$ | $\hat{\mu}_{12,n}$ | $\hat{\mu}_{21,n}$ | $\hat{\mu}_{22,n}$ | $\hat{\psi}_{11,n}$ | $\hat{\psi}_{12,n}$ | $\hat{\psi}_{21,n}$ | $\hat{\psi}_{22,n}$ |                           |
| 0(QMLE)  | mean                   | 0.407              | 0.158              | 0.253              | 0.352              | 3.335               | 3.396               | 2.704               | 2.732               | 6.101                     |
|          | variance $\times 10^3$ | 3.856              | 4.466              | 4.914              | 7.601              | 85.716              | 86.890              | 125.797             | 143.755             |                           |
|          | MSE $\times 10^2$      | 1.231              | 0.615              | 0.704              | 2.923              | 19.755              | 24.338              | 62.026              | 67.863              |                           |
| 0.1      | mean                   | 0.365              | 0.110              | 0.229              | 0.290              | 3.792               | 3.833               | 3.059               | 3.142               | 5.935                     |
|          | variance $\times 10^3$ | 2.743              | 3.439              | 6.536              | 9.276              | 163.374             | 135.454             | 220.784             | 223.580             |                           |
|          | MSE $\times 10^2$      | 2.080              | 1.140              | 1.144              | 5.311              | 78.989              | 82.809              | 134.099             | 152.656             |                           |
| 0.2      | mean                   | 0.484              | 0.183              | 0.284              | 0.428              | 3.212               | 3.251               | 2.395               | 2.385               | 10.210                    |
|          | variance $\times 10^3$ | 4.742              | 5.792              | 3.693              | 8.053              | 61.820              | 68.633              | 79.088              | 81.756              |                           |
|          | MSE $\times 10^2$      | <b>0.493</b>       | 0.601              | <b>0.388</b>       | 1.305              | 10.645              | 13.112              | 23.434              | 22.935              |                           |
| 0.3      | mean                   | 0.489              | 0.189              | 0.277              | 0.448              | 3.160               | 3.176               | 2.323               | 2.323               | 12.264                    |
|          | variance $\times 10^3$ | 5.579              | 5.298              | 3.497              | 7.338              | 49.805              | 55.533              | 59.419              | 78.161              |                           |
|          | MSE $\times 10^2$      | 0.564              | 0.535              | 0.397              | 0.989              | 7.491               | <b>8.615</b>        | 16.370              | 18.207              |                           |
| 0.5      | mean                   | 0.505              | 0.180              | 0.292              | 0.463              | 3.098               | 3.158               | 2.231               | 2.256               | <b>2.853</b>              |
|          | variance $\times 10^3$ | 5.592              | 4.708              | 5.450              | 6.540              | 60.666              | 68.969              | 57.592              | 85.551              |                           |
|          | MSE $\times 10^2$      | 0.557              | <b>0.505</b>       | 0.545              | <b>0.778</b>       | <b>6.970</b>        | 9.352               | <b>11.046</b>       | <b>15.074</b>       |                           |
| 1        | mean                   | 0.438              | 0.139              | 0.247              | 0.426              | 3.261               | 3.277               | 2.353               | 2.384               | 5.257                     |
|          | variance $\times 10^3$ | 5.078              | 8.084              | 5.987              | 7.337              | 72.304              | 88.478              | 84.953              | 98.477              |                           |
|          | MSE $\times 10^2$      | 0.881              | 1.160              | 0.872              | 1.265              | 13.988              | 16.461              | 20.883              | 24.552              |                           |



Table 9: Sample mean, variance, and MSE of estimators for the BSINAR(1) model when  $(\mu_{11}, \mu_{12}, \mu_{21}, \mu_{22}, \psi_{11}, \psi_{12}, \psi_{21}, \psi_{22}) = (0.5, 0.2, 0.2, 0.4, 2, 3, 3, 2)$ ,  $\phi = 0$ , and a big outlier exists.

| $\gamma$ | statistics             | estimators         |                    |                    |                    |                     |                     |                     |                     | $\text{tr}(As.\hat{var})$ |
|----------|------------------------|--------------------|--------------------|--------------------|--------------------|---------------------|---------------------|---------------------|---------------------|---------------------------|
|          |                        | $\hat{\mu}_{11,n}$ | $\hat{\mu}_{12,n}$ | $\hat{\mu}_{21,n}$ | $\hat{\mu}_{22,n}$ | $\hat{\psi}_{11,n}$ | $\hat{\psi}_{12,n}$ | $\hat{\psi}_{21,n}$ | $\hat{\psi}_{22,n}$ |                           |
| 0(QMLE)  | mean                   | 0.337              | 0.105              | 0.133              | 0.272              | 2.514               | 3.106               | 3.389               | 2.105               | 7.213                     |
|          | variance $\times 10^3$ | 2.916              | 4.459              | 4.442              | 4.532              | 86.098              | 82.197              | 88.097              | 84.173              |                           |
|          | MSE $\times 10^2$      | 2.822              | 1.145              | 0.685              | 1.865              | 31.058              | 26.308              | 40.887              | 15.495              |                           |
| 0.1      | mean                   | 0.491              | 0.171              | 0.198              | 0.421              | 2.249               | 3.605               | 3.617               | 2.334               | 6.553                     |
|          | variance $\times 10^3$ | 2.277              | 4.697              | 4.035              | 2.931              | 72.194              | 88.122              | 116.673             | 83.520              |                           |
|          | MSE $\times 10^2$      | 0.232              | 0.548              | <b>0.400</b>       | <b>0.333</b>       | 13.379              | 45.374              | 49.630              | 19.478              |                           |
| 0.2      | mean                   | 0.495              | 0.194              | 0.207              | 0.456              | 2.235               | 3.545               | 3.497               | 2.309               | 4.251                     |
|          | variance $\times 10^3$ | 2.350              | 4.583              | 4.204              | 3.574              | 56.056              | 74.960              | 86.060              | 67.281              |                           |
|          | MSE $\times 10^2$      | 0.234              | <b>0.456</b>       | 0.421              | 0.678              | 11.118              | 37.221              | 33.295              | 16.234              |                           |
| 0.3      | mean                   | 0.514              | 0.186              | 0.201              | 0.457              | 2.257               | 3.475               | 3.520               | 2.248               | 4.369                     |
|          | variance $\times 10^3$ | 1.969              | 4.631              | 4.741              | 3.946              | 84.815              | 82.753              | 91.604              | 84.782              |                           |
|          | MSE $\times 10^2$      | <b>0.216</b>       | 0.475              | 0.469              | 0.722              | 15.043              | 30.849              | 36.131              | 14.552              |                           |
| 0.5      | mean                   | 0.519              | 0.186              | 0.200              | 0.464              | 2.208               | 3.415               | 3.460               | 2.207               | 6.220                     |
|          | variance $\times 10^3$ | 2.267              | 5.065              | 5.497              | 4.425              | 86.134              | 83.850              | 94.374              | 90.839              |                           |
|          | MSE $\times 10^2$      | 0.263              | 0.521              | 0.544              | 0.859              | 12.886              | 25.556              | 30.547              | 13.282              |                           |
| 1        | mean                   | 0.525              | 0.181              | 0.190              | 0.462              | 2.116               | 3.189               | 3.363               | 2.123               | <b>1.894</b>              |
|          | variance $\times 10^3$ | 3.511              | 6.390              | 6.349              | 6.656              | 90.613              | 94.321              | 126.191             | 111.817             |                           |
|          | MSE $\times 10^2$      | 0.413              | 0.667              | 0.638              | 1.046              | <b>10.334</b>       | <b>17.741</b>       | <b>25.726</b>       | <b>12.586</b>       |                           |

Table 10: Sample mean, variance, and MSE of estimators for the BSINAR(1) model when  $(\mu_{11}, \mu_{12}, \mu_{21}, \mu_{22}, \psi_{11}, \psi_{12}, \psi_{21}, \psi_{22}) = (0.5, 0.2, 0.2, 0.4, 2, 3, 3, 2)$ ,  $\phi = 0.5$ , and a big outlier exists.

| $\gamma$ | statistics             | estimators         |                    |                    |                    |                     |                     |                     |                     | $\text{tr}(As.\hat{var})$ |
|----------|------------------------|--------------------|--------------------|--------------------|--------------------|---------------------|---------------------|---------------------|---------------------|---------------------------|
|          |                        | $\hat{\mu}_{11,n}$ | $\hat{\mu}_{12,n}$ | $\hat{\mu}_{21,n}$ | $\hat{\mu}_{22,n}$ | $\hat{\psi}_{11,n}$ | $\hat{\psi}_{12,n}$ | $\hat{\psi}_{21,n}$ | $\hat{\psi}_{22,n}$ |                           |
| 0(QMLE)  | mean                   | 0.328              | 0.107              | 0.124              | 0.275              | 2.528               | 3.182               | 3.379               | 2.417               | 8.003                     |
|          | variance $\times 10^3$ | 2.102              | 3.083              | 2.183              | 2.437              | 72.628              | 67.215              | 55.323              | 76.792              |                           |
|          | MSE $\times 10^2$      | 3.150              | 1.153              | 0.782              | 1.791              | 35.091              | 37.329              | 33.296              | 28.973              |                           |
| 0.1      | mean                   | 0.449              | 0.142              | 0.165              | 0.395              | 2.524               | 3.605               | 3.556               | 2.488               | 6.267                     |
|          | variance $\times 10^3$ | 2.092              | 4.175              | 3.588              | 3.591              | 112.222             | 89.754              | 82.526              | 107.946             |                           |
|          | MSE $\times 10^2$      | 0.460              | 0.740              | 0.471              | <b>0.357</b>       | 38.643              | 45.575              | 39.150              | 34.557              |                           |
| 0.2      | mean                   | 0.462              | 0.153              | 0.173              | 0.418              | 2.472               | 3.525               | 3.495               | 2.436               | 5.154                     |
|          | variance $\times 10^3$ | 2.649              | 4.511              | 3.600              | 3.344              | 100.803             | 80.910              | 76.806              | 92.398              |                           |
|          | MSE $\times 10^2$      | 0.400              | 0.660              | <b>0.426</b>       | 0.364              | 32.267              | 35.581              | 32.133              | 28.184              |                           |
| 0.3      | mean                   | 0.471              | 0.158              | 0.180              | 0.423              | 2.435               | 3.467               | 3.455               | 2.401               | 7.903                     |
|          | variance $\times 10^3$ | 2.350              | 4.340              | 4.053              | 3.535              | 82.913              | 70.145              | 72.099              | 87.600              |                           |
|          | MSE $\times 10^2$      | 0.316              | <b>0.601</b>       | 0.438              | 0.403              | 27.180              | 28.838              | 27.907              | 24.831              |                           |
| 0.5      | mean                   | 0.478              | 0.156              | 0.184              | 0.430              | 2.396               | 3.408               | 3.409               | 2.363               | 4.010                     |
|          | variance $\times 10^3$ | 2.961              | 4.715              | 4.335              | 3.798              | 79.034              | 68.091              | 64.388              | 85.059              |                           |
|          | MSE $\times 10^2$      | 0.337              | 0.654              | 0.452              | 0.468              | 23.507              | 23.410              | 23.109              | 21.623              |                           |
| 1        | mean                   | 0.496              | 0.152              | 0.181              | 0.439              | 2.305               | 3.262               | 3.284               | 2.257               | <b>2.782</b>              |
|          | variance $\times 10^3$ | 3.224              | 5.175              | 5.486              | 5.050              | 74.625              | 62.800              | 60.695              | 93.587              |                           |
|          | MSE $\times 10^2$      | <b>0.320</b>       | 0.739              | 0.577              | 0.655              | <b>16.710</b>       | <b>13.119</b>       | <b>14.092</b>       | <b>15.897</b>       |                           |

Table 11: Sample mean, variance, and MSE of estimators for the BSINAR(1) model when  $(\mu_{11}, \mu_{12}, \mu_{21}, \mu_{22}, \psi_{11}, \psi_{12}, \psi_{21}, \psi_{22}) = (0.5, 0.2, 0.3, 0.5, 3, 3, 2, 2)$ ,  $\phi = 0$ , and a big outlier exists.

| $\gamma$ | statistics             | estimators         |                    |                    |                    |                     |                     |                     |                     | $\text{tr}(As.\hat{var})$ |
|----------|------------------------|--------------------|--------------------|--------------------|--------------------|---------------------|---------------------|---------------------|---------------------|---------------------------|
|          |                        | $\hat{\mu}_{11,n}$ | $\hat{\mu}_{12,n}$ | $\hat{\mu}_{21,n}$ | $\hat{\mu}_{22,n}$ | $\hat{\psi}_{11,n}$ | $\hat{\psi}_{12,n}$ | $\hat{\psi}_{21,n}$ | $\hat{\psi}_{22,n}$ |                           |
| 0(QMLE)  | mean                   | 0.331              | 0.095              | 0.190              | 0.312              | 3.431               | 3.085               | 2.675               | 2.200               | 4.122                     |
|          | variance $\times 10^3$ | 1.729              | 2.339              | 2.625              | 3.517              | 62.311              | 66.613              | 72.772              | 89.273              |                           |
|          | MSE $\times 10^2$      | 3.009              | 1.315              | 1.462              | 3.880              | 24.711              | 17.327              | 52.781              | 12.854              |                           |
| 0.1      | mean                   | 0.459              | 0.145              | 0.284              | 0.436              | 3.459               | 3.497               | 2.429               | 2.443               | 5.115                     |
|          | variance $\times 10^3$ | 2.698              | 5.622              | 4.170              | 4.685              | 97.206              | 71.053              | 116.627             | 108.364             |                           |
|          | MSE $\times 10^2$      | 0.428              | 0.848              | 0.438              | 0.871              | 30.757              | 31.793              | 30.030              | 30.375              |                           |
| 0.2      | mean                   | 0.476              | 0.144              | 0.285              | 0.455              | 3.433               | 3.442               | 2.357               | 2.333               | 5.948                     |
|          | variance $\times 10^3$ | 3.276              | 5.606              | 3.015              | 4.155              | 65.272              | 78.245              | 82.906              | 120.361             |                           |
|          | MSE $\times 10^2$      | 0.380              | 0.857              | 0.320              | 0.605              | 25.234              | 27.301              | 20.996              | 23.010              |                           |
| 0.3      | mean                   | 0.473              | 0.170              | 0.280              | 0.471              | 3.449               | 3.437               | 2.356               | 2.355               | 6.112                     |
|          | variance $\times 10^3$ | 2.629              | 6.014              | 2.656              | 3.456              | 71.451              | 71.426              | 72.689              | 100.594             |                           |
|          | MSE $\times 10^2$      | 0.329              | <b>0.683</b>       | <b>0.299</b>       | <b>0.422</b>       | 27.307              | 26.210              | 19.917              | 22.585              |                           |
| 0.5      | mean                   | 0.481              | 0.157              | 0.278              | 0.477              | 3.371               | 3.346               | 2.211               | 2.268               | 5.078                     |
|          | variance $\times 10^3$ | 2.840              | 7.310              | 4.044              | 4.863              | 116.421             | 109.163             | 93.647              | 107.599             |                           |
|          | MSE $\times 10^2$      | <b>0.314</b>       | 0.908              | 0.448              | 0.532              | 25.291              | 22.836              | 13.763              | 17.853              |                           |
| 1        | mean                   | 0.497              | 0.166              | 0.286              | 0.477              | 3.220               | 3.209               | 2.130               | 2.143               | <b>3.246</b>              |
|          | variance $\times 10^3$ | 5.404              | 10.186             | 4.692              | 5.228              | 100.859             | 60.149              | 84.740              | 81.243              |                           |
|          | MSE $\times 10^2$      | 0.535              | 1.120              | 0.482              | 0.570              | <b>14.827</b>       | <b>10.329</b>       | <b>10.079</b>       | <b>10.096</b>       |                           |

Table 12: Sample mean, variance, and MSE of estimators for the BSINAR(1) model when  $(\mu_{11}, \mu_{12}, \mu_{21}, \mu_{22}, \psi_{11}, \psi_{12}, \psi_{21}, \psi_{22}) = (0.5, 0.2, 0.3, 0.5, 3, 3, 2, 2)$ ,  $\phi = 0.5$ , and a big outlier exists.

| $\gamma$ | statistics             | estimators         |                    |                    |                    |                     |                     |                     |                     | $\text{tr}(As.\hat{var})$ |
|----------|------------------------|--------------------|--------------------|--------------------|--------------------|---------------------|---------------------|---------------------|---------------------|---------------------------|
|          |                        | $\hat{\mu}_{11,n}$ | $\hat{\mu}_{12,n}$ | $\hat{\mu}_{21,n}$ | $\hat{\mu}_{22,n}$ | $\hat{\psi}_{11,n}$ | $\hat{\psi}_{12,n}$ | $\hat{\psi}_{21,n}$ | $\hat{\psi}_{22,n}$ |                           |
| 0(QMLE)  | mean                   | 0.325              | 0.097              | 0.178              | 0.275              | 3.325               | 3.390               | 2.644               | 2.330               | 8.226                     |
|          | variance $\times 10^3$ | 1.574              | 1.734              | 3.150              | 4.366              | 112.475             | 82.293              | 149.495             | 163.423             |                           |
|          | MSE $\times 10^2$      | 3.197              | 1.229              | 1.778              | 5.473              | 21.725              | 8.970               | 56.347              | 27.090              |                           |
| 0.1      | mean                   | 0.414              | 0.132              | 0.252              | 0.374              | 3.468               | 3.528               | 2.559               | 2.617               | 9.211                     |
|          | variance $\times 10^3$ | 3.050              | 4.614              | 4.253              | 6.138              | 118.359             | 106.733             | 171.623             | 172.299             |                           |
|          | MSE $\times 10^2$      | 1.032              | 0.915              | 0.646              | 2.193              | 33.652              | 38.452              | 48.265              | 55.197              |                           |
| 0.2      | mean                   | 0.440              | 0.129              | 0.264              | 0.401              | 3.427               | 3.411               | 2.542               | 2.546               | 8.834                     |
|          | variance $\times 10^3$ | 2.793              | 3.435              | 4.833              | 6.899              | 88.413              | 92.857              | 130.642             | 134.567             |                           |
|          | MSE $\times 10^2$      | 0.627              | 0.833              | 0.602              | 1.659              | 26.992              | 26.126              | 42.344              | 43.155              |                           |
| 0.3      | mean                   | 0.442              | 0.150              | 0.267              | 0.408              | 3.389               | 3.429               | 2.424               | 2.445               | 7.011                     |
|          | variance $\times 10^3$ | 3.111              | 4.727              | 5.981              | 6.089              | 99.756              | 107.494             | 140.457             | 102.989             |                           |
|          | MSE $\times 10^2$      | 0.644              | <b>0.710</b>       | 0.697              | 1.444              | 25.037              | 29.051              | 31.906              | 30.058              |                           |
| 0.5      | mean                   | 0.436              | 0.150              | 0.262              | 0.416              | 3.321               | 3.333               | 2.371               | 2.395               | 3.964                     |
|          | variance $\times 10^3$ | 2.841              | 6.140              | 4.038              | 5.374              | 69.652              | 80.009              | 86.088              | 75.130              |                           |
|          | MSE $\times 10^2$      | 0.690              | 0.848              | <b>0.539</b>       | 1.236              | 17.205              | 19.026              | 22.358              | 23.070              |                           |
| 1        | mean                   | 0.474              | 0.130              | 0.257              | 0.445              | 3.185               | 3.169               | 2.301               | 2.230               | <b>3.826</b>              |
|          | variance $\times 10^3$ | 3.019              | 5.653              | 4.821              | 6.623              | 80.451              | 57.844              | 104.112             | 79.826              |                           |
|          | MSE $\times 10^2$      | <b>0.362</b>       | 1.039              | 0.658              | <b>0.954</b>       | <b>11.422</b>       | <b>8.608</b>        | <b>19.420</b>       | <b>13.229</b>       |                           |
